# Supplementary material for: Tracking of Antibiotic Resistance Transfer and Rapid Plasmid Evolution in a Hospital Setting by Nanopore Sequencing
Source: PubMed Central journal article supplement (PMC7440845; doi:10.1128/msphere.00525-20), 2020-08-19
Supplement: mSphere.00525-20-st001.pdf [file mSphere.00525-20-st001.pdf]

| <b>Sample</b> | <b>Number of reads:</b> | <b>Median read length:</b> | <b>Median read quality:</b> | <b>Flowcell version:</b> | <b>ONT Kit:</b> |
|---------------|-------------------------|----------------------------|-----------------------------|--------------------------|-----------------|
| 28_P_CC       | 107501                  | 3731                       | 7.7                         | FLO-MAP103               | SQK_MAP006      |
| 30_P_CF       | 449375                  | 3300                       | 9.4                         | FLO-MIN106               | SQK-LSK108      |
| 32_P_CF       | 689747                  | 3134                       | 9                           | FLO-MIN106               | SQK-LSK108      |
| 34_P_CF       | 640898                  | 3163                       | 9.8                         | FLO-MIN106               | SQK-LSK108      |
| 9_E_CF        | 59275                   | 1572                       | 7.8                         | FLO-MIN106               | SQK-LSK108      |
| 38_P_CF       | 327411                  | 5908                       | 8.6                         | FLO-MIN106               | SQK-LSK108      |
| 27_P_CF       | 89853                   | 1918                       | 6.9                         | FLO-MIN105               | SQK-NSK007      |
| 29_P_CF       | 926772                  | 2753                       | 9.7                         | FLO-MIN106               | SQK-LSK108      |
| 13_E_CF       | 224377                  | 2136                       | 9.1                         | FLO-MIN106               | SQK-LSK108      |
| 9_P_PA        | 71923                   | 4373                       | 8.5                         | FLO-MIN105               | SQK-NSK007      |
| 11_P_PA       | 50986                   | 6222                       | 8.8                         | FLO-MIN105               | SQK-NSK007      |
| 37_P_PA       | 137180                  | 3542                       | 6.5                         | FLO-MIN105               | SQK-NSK007      |
| 39_P_PA       | 41934                   | 1340                       | 3.9                         | FLO-MIN105               | SQK-NSK007      |
| 23_P_PA       | 149047                  | 2127                       | 6.6                         | FLO-MIN106               | SQK-LSK108      |
