# Supplementary material for: Tracking of Antibiotic Resistance Transfer and Rapid Plasmid Evolution in a Hospital Setting by Nanopore Sequencing
Source: PubMed Central journal article supplement (PMC7440845; doi:10.1128/msphere.00525-20), 2020-08-19
Supplement: mSphere.00525-20-st002.pdf [file mSphere.00525-20-st002.pdf]

| Sample ID | # contigs | Largest contig | Total length | GC (%) | N50     | N75     | L50 | L75 |
|-----------|-----------|----------------|--------------|--------|---------|---------|-----|-----|
| 28_P_CC   | 3         | 5062321        | 5230854      | 52.09  | 5062321 | 5062321 | 1   | 1   |
| 30_P_CF   | 6         | 4745085        | 5272837      | 51.88  | 4745085 | 4745085 | 1   | 1   |
| 32_P_CF   | 5         | 5038088        | 5260813      | 51.87  | 5038088 | 5038088 | 1   | 1   |
| 34_P_CF   | 5         | 4892588        | 5110715      | 51.71  | 4892588 | 4892588 | 1   | 1   |
| 9_E_CF    | 29        | 1444960        | 5262884      | 51.80  | 636697  | 296195  | 3   | 6   |
| 38_P_CF   | 6         | 4889818        | 5112060      | 51.69  | 4889818 | 4889818 | 1   | 1   |
| 27_P_CF   | 25        | 1834568        | 5388324      | 51.84  | 915012  | 298121  | 2   | 5   |
| 29_P_CF   | 10        | 2415109        | 5401457      | 51.80  | 2241041 | 2241041 | 2   | 2   |
| 13_E_CF   | 11        | 3937886        | 5105413      | 51.69  | 3937886 | 3937886 | 1   | 1   |
| 9_P_PA    | 18        | 1941814        | 6786480      | 66.14  | 1894580 | 572642  | 2   | 4   |
| 11_P_PA   | 14        | 1894702        | 6808107      | 66.12  | 1693847 | 948850  | 2   | 4   |
| 37_P_PA   | 20        | 1907170        | 6818725      | 66.11  | 1047546 | 547243  | 3   | 5   |
| 39_P_PA   | 19        | 1988153        | 6650226      | 66.21  | 1549117 | 1486086 | 2   | 3   |
| 23_P_PA   | 36        | 1047588        | 6766190      | 66.14  | 466918  | 315712  | 5   | 9   |
