# Supplementary material for: Tracking of Antibiotic Resistance Transfer and Rapid Plasmid Evolution in a Hospital Setting by Nanopore Sequencing
Source: PubMed Central journal article supplement (PMC7440845; doi:10.1128/msphere.00525-20), 2020-08-19
Supplement: mSphere.00525-20-st003.pdf [file mSphere.00525-20-st003.pdf]

A)

| Strain Id | Species              | # Plasmids | Plasmid types |
|-----------|----------------------|------------|---------------|
| 9_P_PA    | <i>P. aeruginosa</i> | 4          | A, E, F       |
| 11_P_PA   | <i>P. aeruginosa</i> | 3          | A, E          |
| 37_P_PA   | <i>P. aeruginosa</i> | 3          | A, E          |
| 39_P_PA   | <i>P. aeruginosa</i> | 3          | A', E         |
| 28_P_CC   | <i>C. cronae</i>     | 2          | C             |
| 30_P_CF   | <i>C. freundii</i>   | 3          | A, B          |
| 32_P_CF   | <i>C. freundii</i>   | 4          | A, B, D       |
| 34_P_CF   | <i>C. freundii</i>   | 4          | A, F, B', G,  |
| 9_E_CF    | <i>C. freundii</i>   | 3          | A, B          |
| 38_P_CF   | <i>C. freundii</i>   | 5          | A, B'', G', H |
| 23_P_PA   | <i>P. aeruginosa</i> | 3          | A, E          |
| 27_P_CF   | <i>C. freundii</i>   | 4          | A, B, I       |
| 29_P_CF   | <i>C. freundii</i>   | 4          | A, B, J       |
| 13_E_CF   | <i>C. freundii</i>   | 5          | A, B'', G', H |

B)

| Plasmid | Length | GC %  | Res. Genes | Closest Hit (NCBI) | Query cover | Identity % |
|---------|--------|-------|------------|--------------------|-------------|------------|
| A       | 39882  | 58,92 | yes        | LT837805.1         | 63%         | 97         |
| A'      | 39371  | 58,82 | yes        | LT837805.2         | 64%         | 97         |
| B       | 88318  | 45,02 | no         | CP033074.1         | 39%         | 78         |
| B'      | 86220  | 45,09 | no         | CP033074.2         | 37%         | 78         |
| B''     | 85137  | 45,18 | no         | CP033074.2         | 38%         | 78         |
| C       | 163147 | 51,8  | yes        | CP011977.1         | 18%         | 99         |
| D       | 89139  | 52,09 | no         | CP024881.1         | 98%         | 99         |
| E       | 7173   | 56,6  | no         | CP027172.1         | 94%         | 99         |
| F       | 2009   | 63,27 | no         | LN853727.1         | 14%         | 75         |
| G       | 86638  | 49,21 | no         | CP023978.0         | 5%          | 98         |
| G'      | 85406  | 49,24 | no         | CP023978.1         | 4%          | 98         |
| H       | 6431   | 39,08 | no         | AY842156.1         | 4%          | 86         |
| I       | 76389  | 51,84 | no         | CP016762.1         | 79%         | 99         |
| J       | 162283 | 49,42 | no         | CP024882.1         | 73%         | 99         |
