# Supplementary material for: Tracking of Antibiotic Resistance Transfer and Rapid Plasmid Evolution in a Hospital Setting by Nanopore Sequencing
Source: PubMed Central journal article supplement (PMC7440845; doi:10.1128/msphere.00525-20), 2020-08-19
Supplement: mSphere.00525-20-st004.pdf [file mSphere.00525-20-st004.pdf]

| Sample ID | Missing resistance genes                      |
|-----------|-----------------------------------------------|
| 27_P_C    | qacH                                          |
| 10_E_PA   | aph(3')-XV                                    |
| 10_P_PA   | qacH                                          |
| 11_E_PA   | aph(3')-XV                                    |
| 12_E_PA   | aph(3')-XV, qacH                              |
| 14_E_PA   | qacH                                          |
| 19_P_PA   | qacH                                          |
| 22_P_PA   | qacH                                          |
| 24_P_PA   | qacH, blaOXA-10                               |
| 25_P_PA   | qacH, blaOXA-10                               |
| 31_P_PA   | qacH (partial)                                |
| 7_E_PA    | aac(6')-Ib-cr, qacH, aac(6')-Ib-cr, blaOXA-10 |
| 8_E_PA    | qacH, blaOXA-10                               |
